# Supplementary material
Source: publisher figshare collection journal article supplement (https://springernature.figshare.com/ndownloader/files/20022755)
Supplement: Supplementary file [file 20022755]

**Fig 6C S**

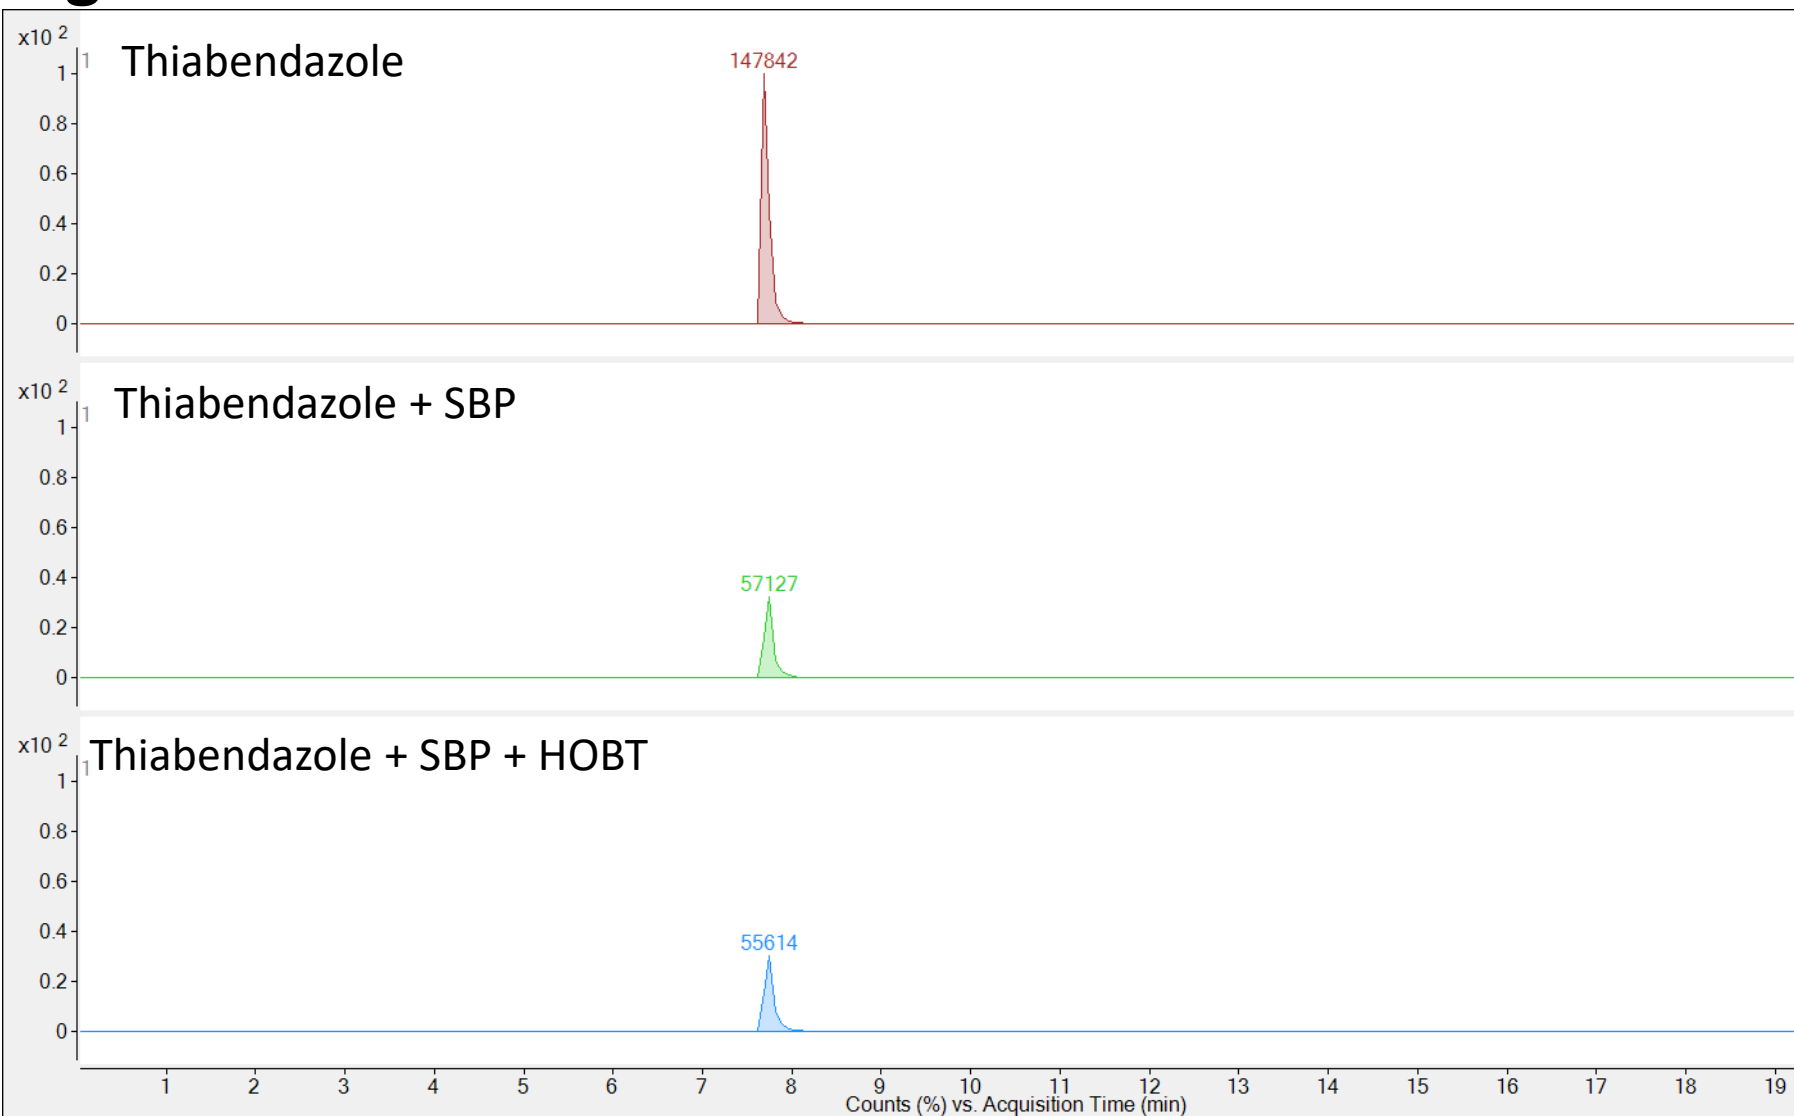

**Figure 6C S:** Effect of redox mediator on peroxidase-mediated pollutant degradation.

**(C)** Thiabendazole remaining after treatment with SBP enzyme with and without HOBT.

[Thiabendazole] = 2 ppm, [H<sub>2</sub>O<sub>2</sub>] = 0.1 mM added 3 times of 10 min interval, [HOBT] = 0.1 mM, pH = 4 with SBP enzyme and pH = 5 with MnP enzyme, [enzyme] = 0.36μM.

**Fig 6D S**

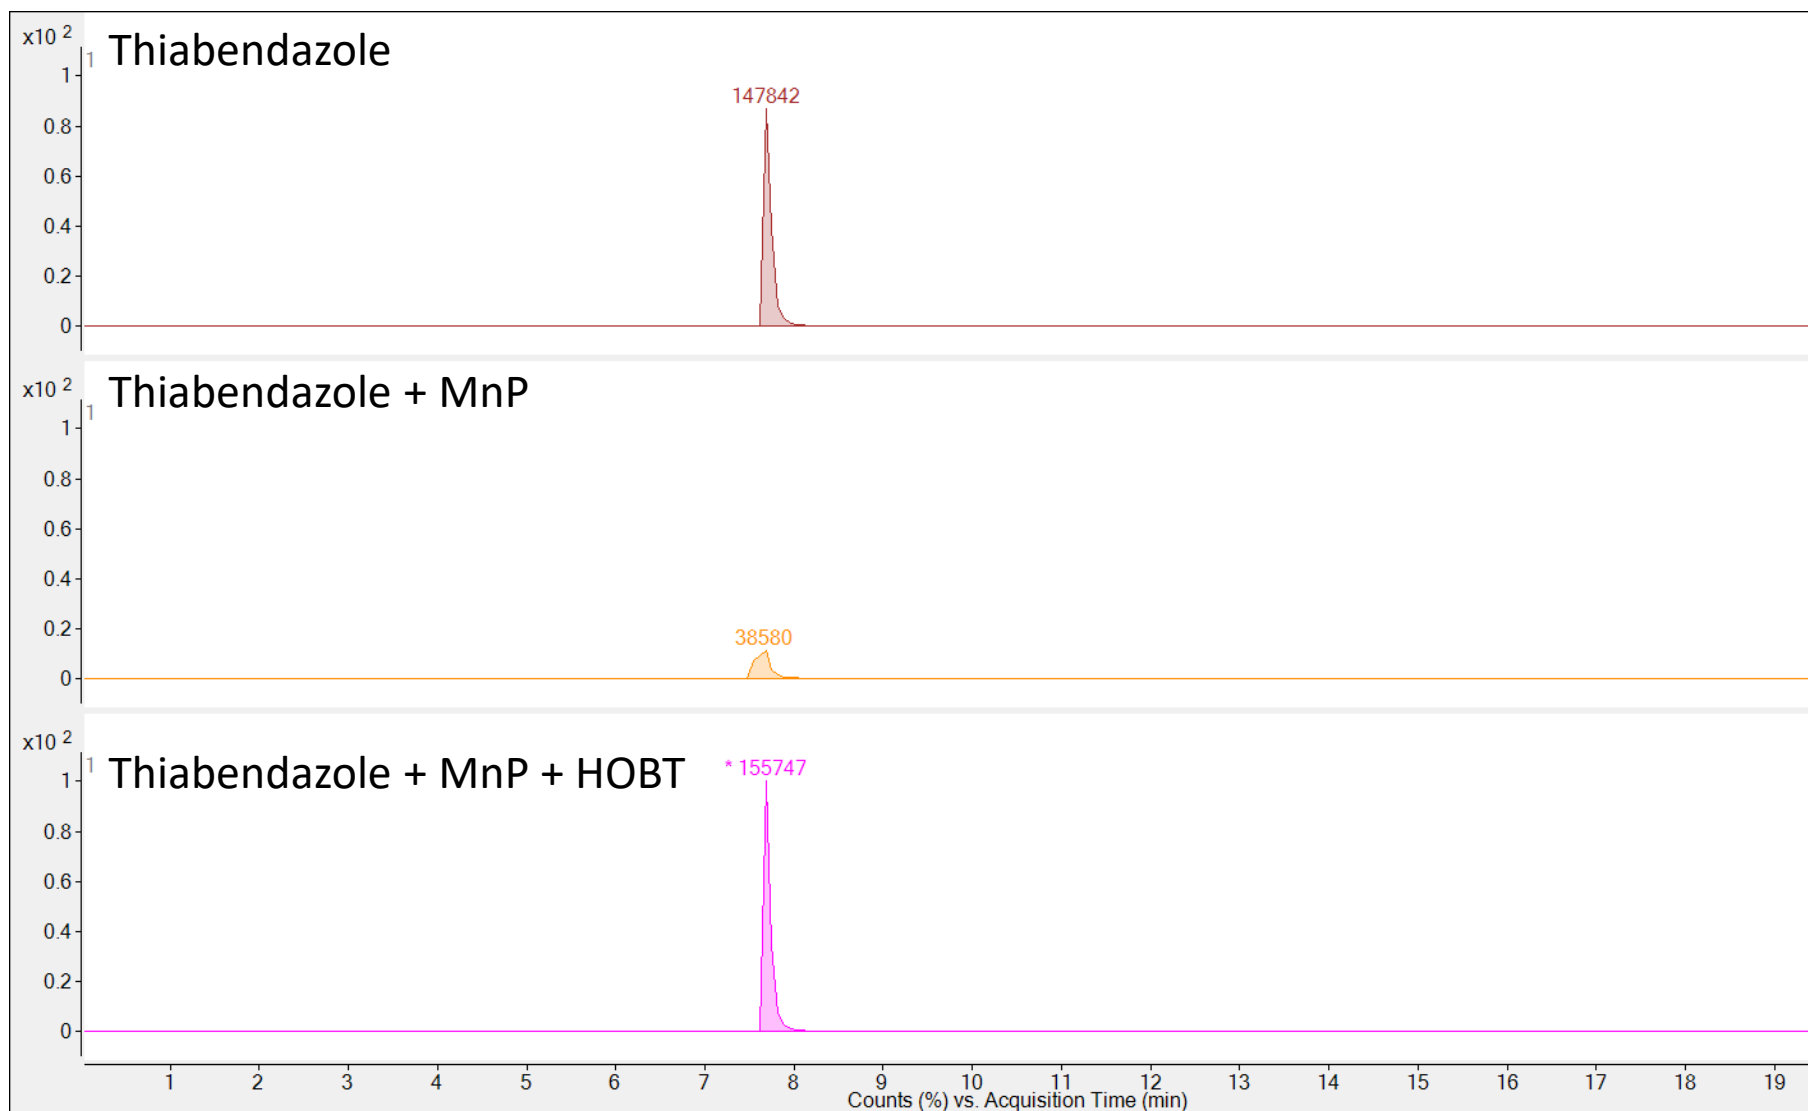

**Figure 6D S:** Effect of redox mediator on peroxidase-mediated pollutant degradation. .

**(D)** Thiabendazole remaining after treatment with MnP enzyme with and without HOBT.

[Thiabendazole] = 2 ppm,  $[H_2O_2]$  = 0.1 mM added 3 times of 10 min interval, [HOBT] = 0.1 mM, pH = 4 with SBP enzyme and pH = 5 with MnP enzyme, [enzyme] = 0.36  $\mu$ M.

**Fig 7A S**

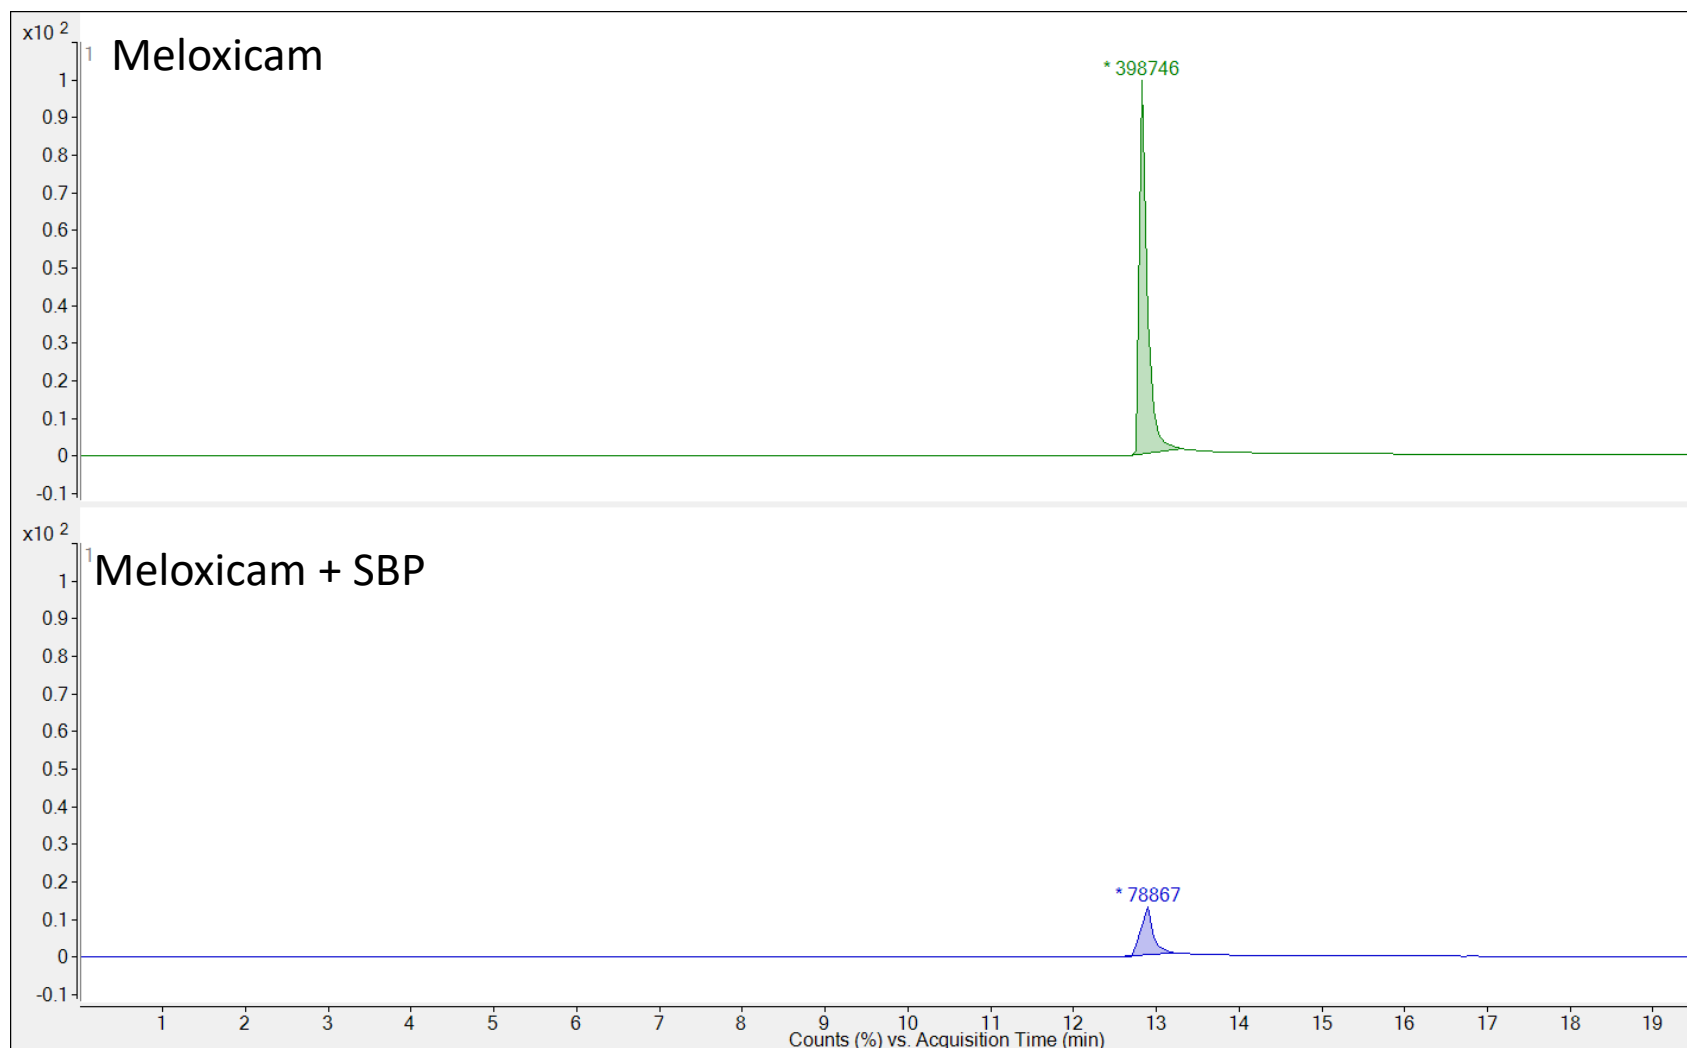

**Figure 7A S:** Degradation of pollutants spiked in real wastewater.

**(A)** Meloxicam remaining after treatment with SBP enzyme. [SBP] = 1.56 $\mu$ M, [H<sub>2</sub>O<sub>2</sub>] = 0.1 mM, [HOBT] = 50  $\mu$ M, pH = 4.

**Fig 7B S**

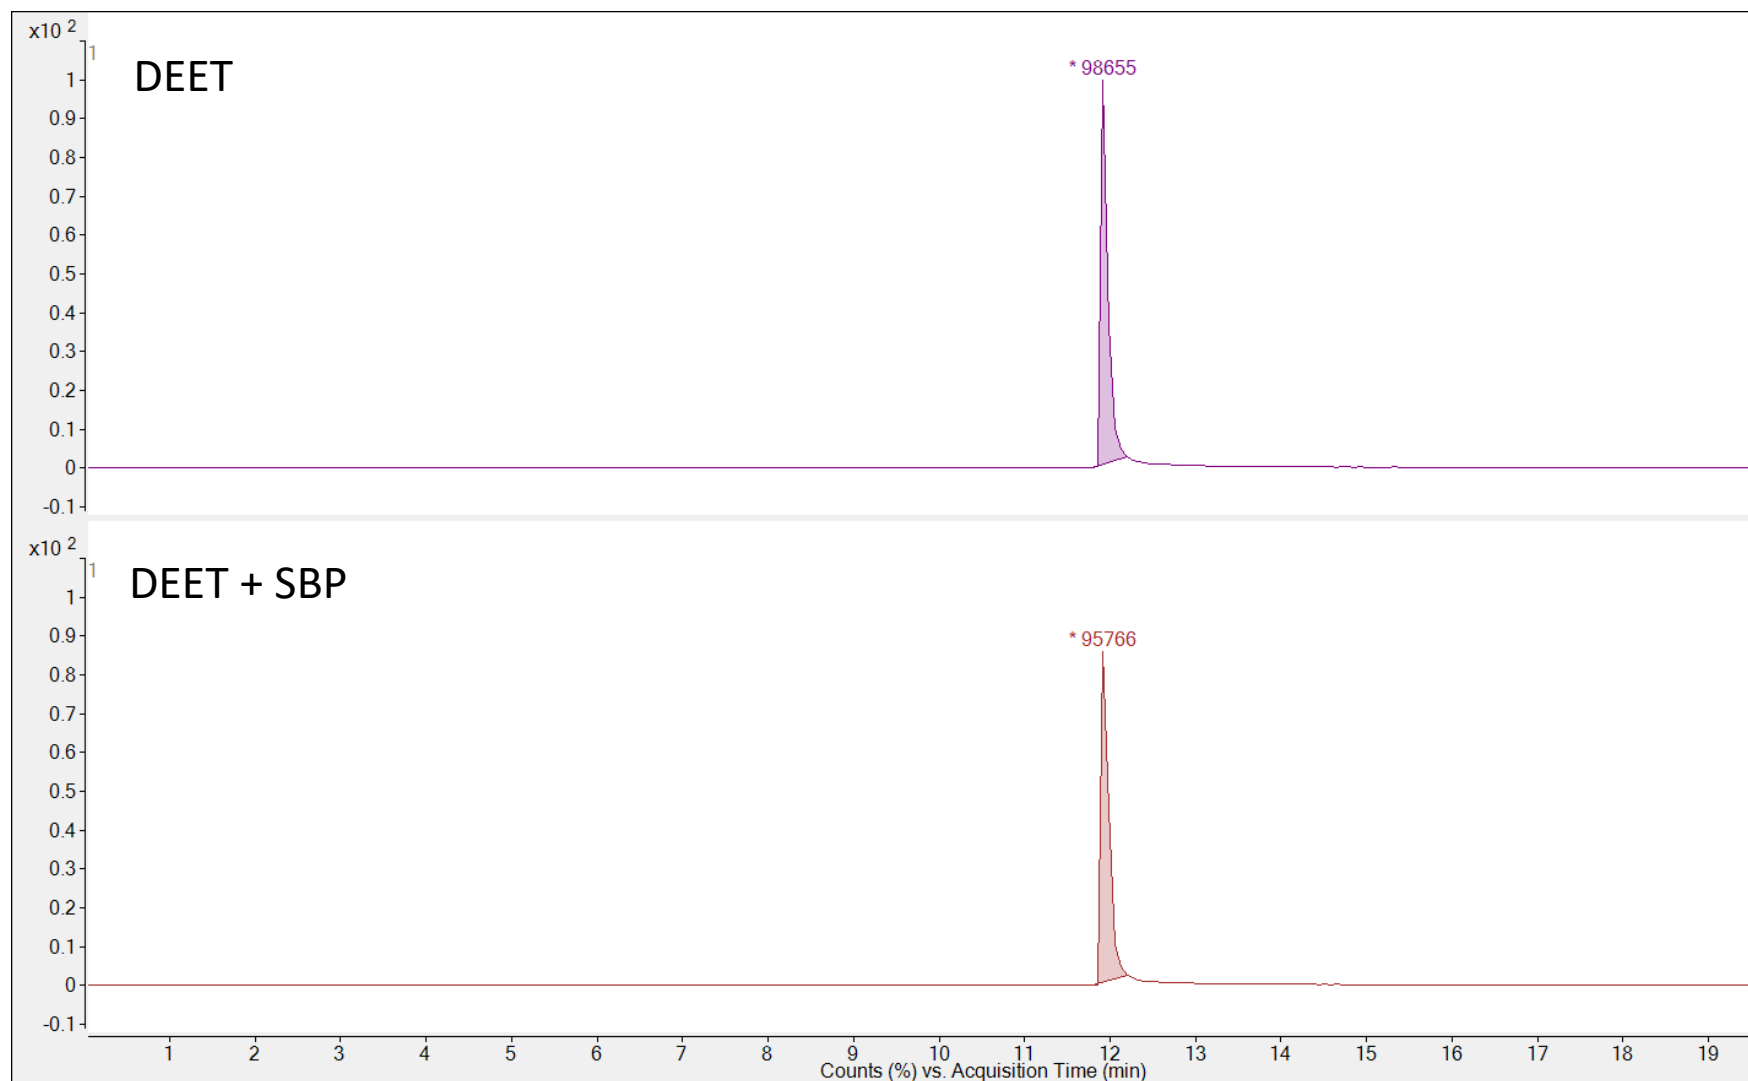

**Figure 7B S:** Degradation of pollutants spiked in real wastewater.

**(B)** DEET remaining after treatment with SBP enzyme. [SBP] = 1.56 $\mu$ M, [H<sub>2</sub>O<sub>2</sub>] = 0.1 mM, [HOBT] = 50  $\mu$ M, pH = 4.

**Fig 9B S**

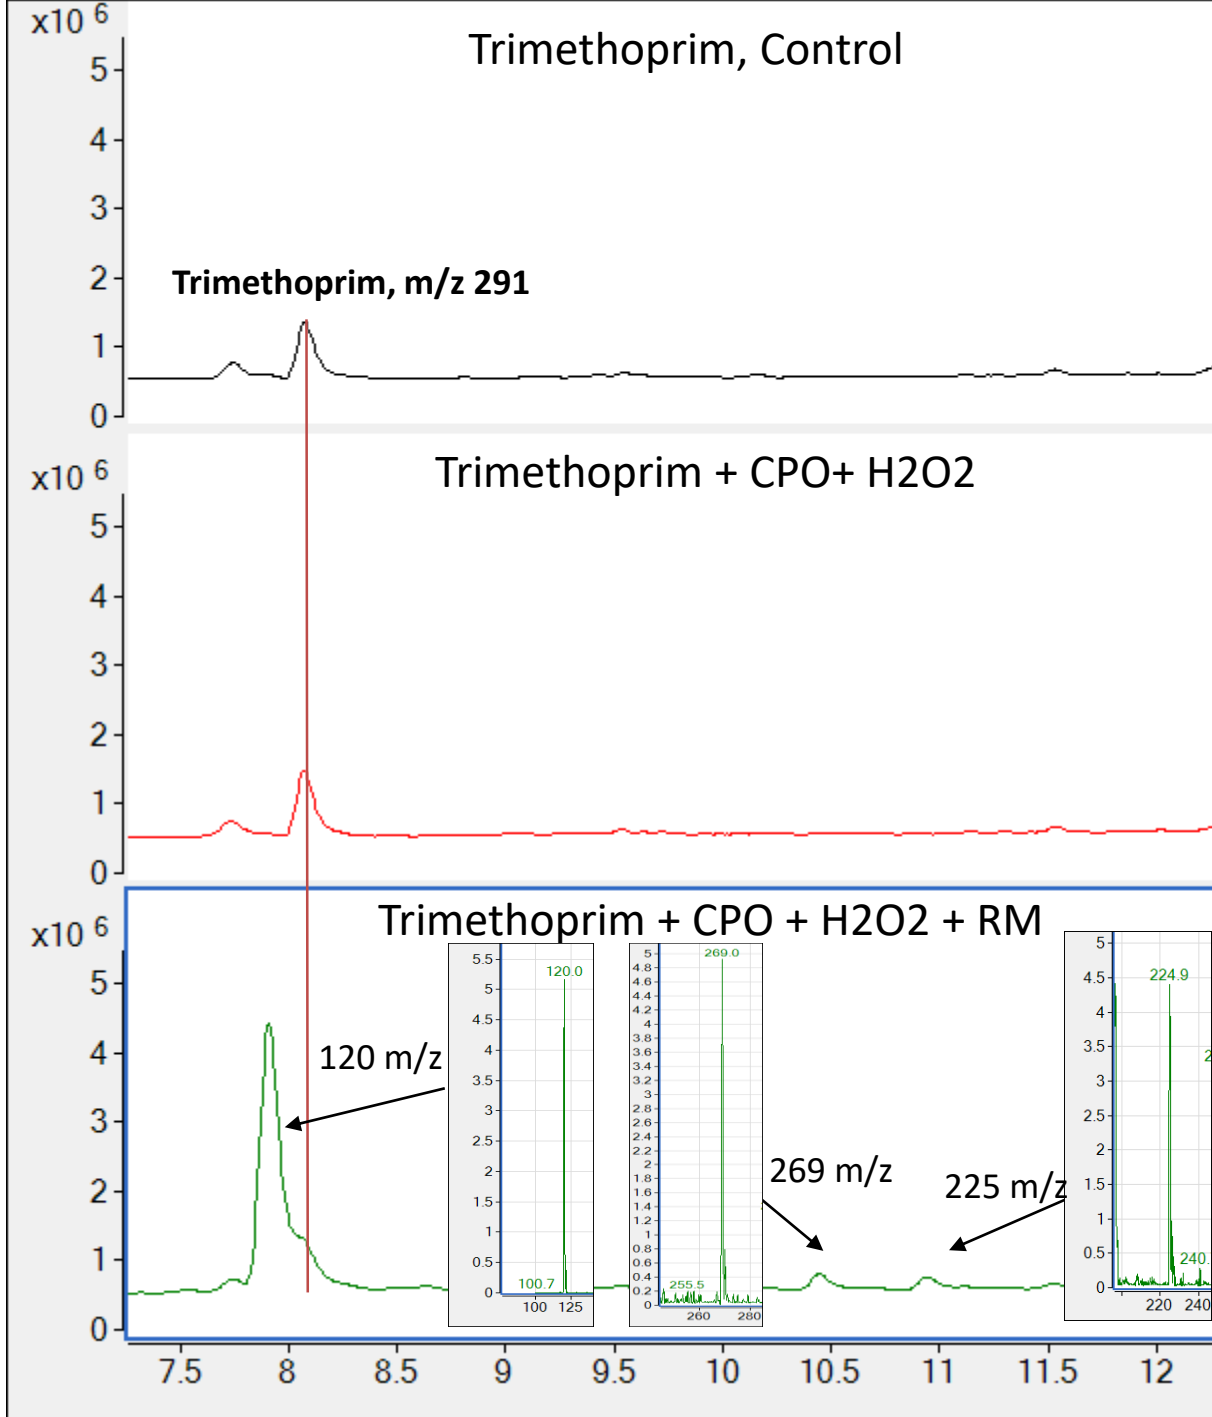

**Figure 9B S: (B)**  
Degradation of  
Trimethoprim by  
CPO + H<sub>2</sub>O<sub>2</sub> + HOBT
